# Supplementary material for: Reversible thermochromic property of Cr, Mn, Fe, Co-doped Ca14Zn6Ga10O35
Source: Royal Society of Chemistry journal article supplement (doi:10.1039/d0tc00921k), 2020-01-01
Supplement: d0tc00921k1.pdf [file d0tc00921k1.pdf]

## Supporting Information for

### Reversible Thermochromic property of Cr, Mn, Fe, Co-doped

#### **Ca<sub>14</sub>Zn<sub>6</sub>Ga<sub>10</sub>O<sub>35</sub>**

Huanhuan Liu,<sup>a</sup> Long Yuan,<sup>\*b</sup> Xiaofeng Wu,<sup>a</sup> Xiangyan Hou,<sup>a</sup> Meng Tang,<sup>a</sup> Changmin Hou,<sup>\*a</sup> Huanwen Chen<sup>\*a</sup> and Shouhua Feng<sup>a</sup>

<sup>a</sup>State Key Laboratory of Inorganic Synthesis and Preparative Chemistry, College of Chemistry, Jilin University, Changchun 130012, P.R. China.

<sup>b</sup>Key Laboratory of Functional Materials Physics and Chemistry of the Ministry of Education, Jilin Normal University, Changchun 130103, P.R. China.

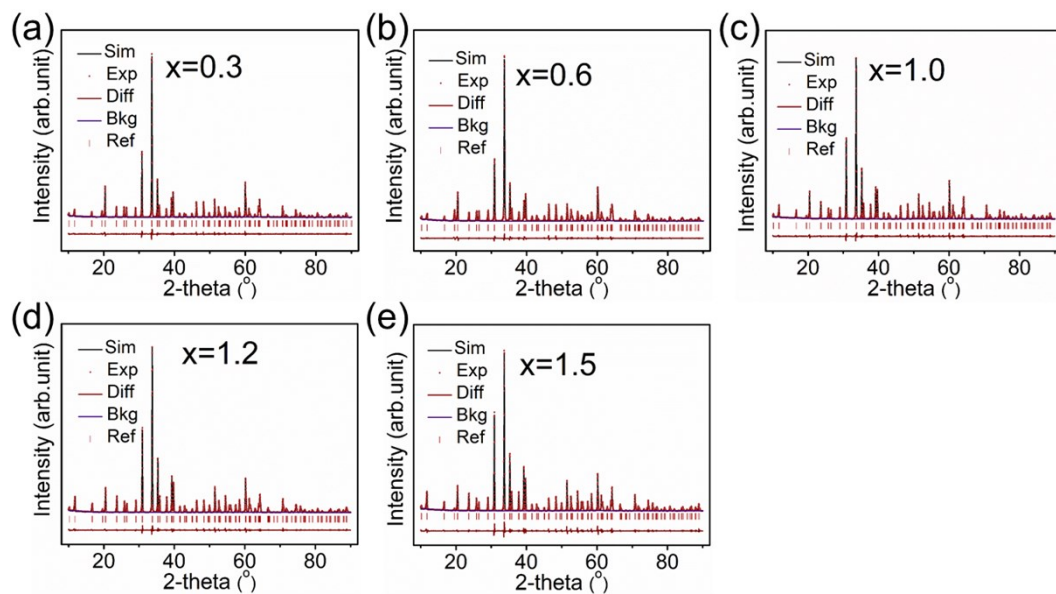

Fig. S1. Pawley refinement of powder of x-ray diffraction spectra of  $\text{Ca}_{14}\text{Zn}_6\text{Ga}_{10-x}\text{Cr}_x\text{O}_{35}$  with (a)  $x=0.3$ , (b)  $x=0.6$ , (c)  $x=1.0$ , (d)  $x=1.2$ , and (e)  $x=1.5$ , respectively.

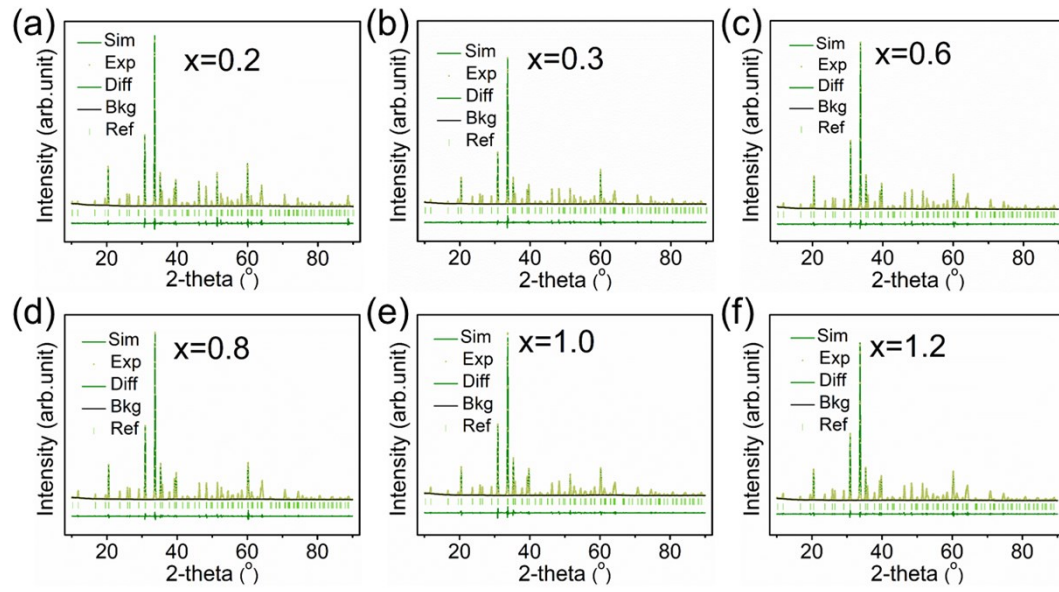

Fig. S2. Pawley refinement of powder of x-ray diffraction spectra of  $\text{Ca}_{14}\text{Zn}_6\text{Ga}_{10-x}\text{Mn}_x\text{O}_{35}$  with (a)  $x=0.2$ , (b)  $x=0.3$ , (c)  $x=0.6$ , (d)  $x=0.8$ , (e)  $x=1.0$ , and (f)  $x=1.2$ , respectively.

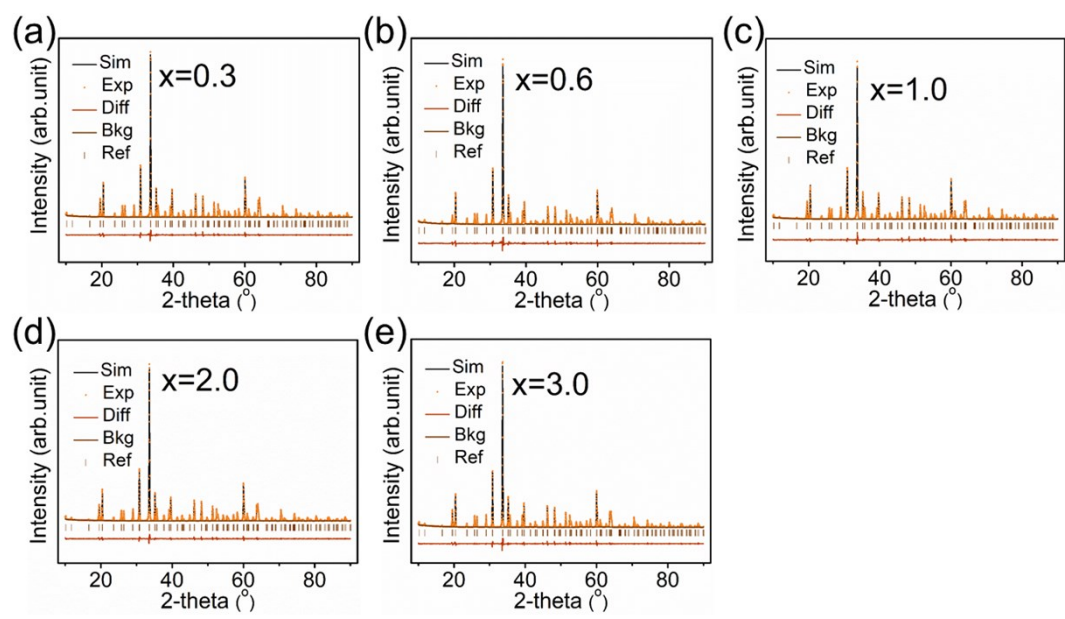

Fig. S3. Pawley refinement of powder of x-ray diffraction spectra of  $\text{Ca}_{14}\text{Zn}_6\text{Ga}_{10-x}\text{Fe}_x\text{O}_{35}$  with (a)  $x=0.3$ , (b)  $x=0.6$ , (c)  $x=1.0$ , (d)  $x=2.0$ , and (e)  $x=3.0$ , respectively.

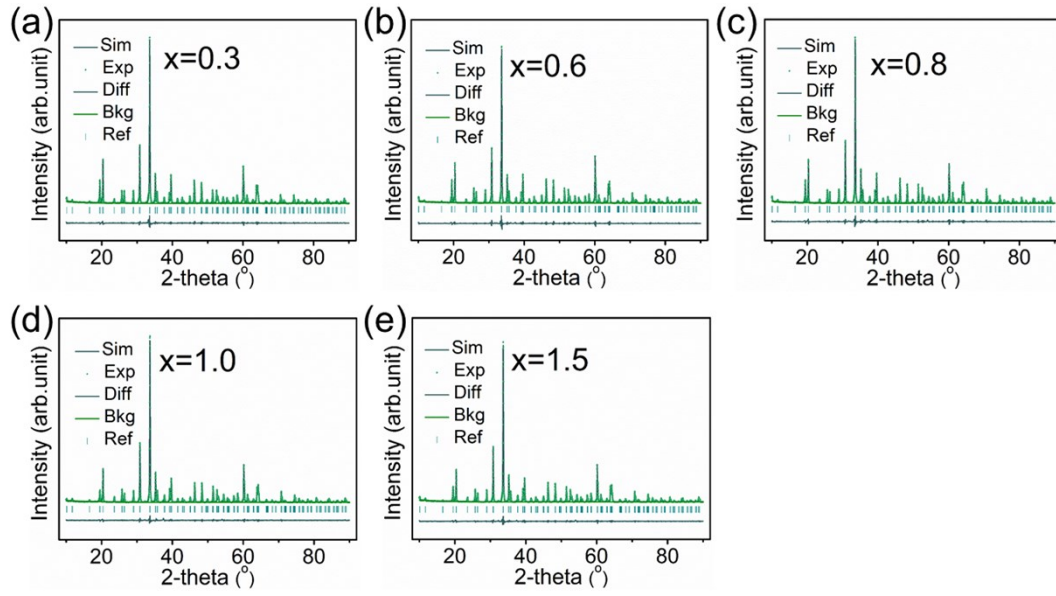

Fig. S4. Pawley refinement of powder of x-ray diffraction spectra of  $\text{Ca}_{14}\text{Zn}_6\text{Ga}_{10-x}\text{Co}_x\text{O}_{35}$  with (a)  $x=0.3$ , (b)  $x=0.6$ , (c)  $x=0.8$ , (d)  $x=1.0$ , and (e)  $x=1.5$ , respectively.

Table S1 XRD refinement results of  $\text{Ca}_{14}\text{Zn}_6\text{Ga}_{10-x}\text{M}_x\text{O}_{35}$  (M=Cr, Mn, Fe, Co) thermochromic pigments

| $\text{Ca}_{14}\text{Zn}_6\text{Ga}_{10-x}\text{Cr}_x\text{O}_{35}$ |              |             |             |              |                     |                    |
|---------------------------------------------------------------------|--------------|-------------|-------------|--------------|---------------------|--------------------|
| x                                                                   | Lattice Type | Space Group | Lattice (Å) | $\alpha$ (°) | $R_{\text{wp}}$ (%) | $R_{\text{p}}$ (%) |
| 0.3                                                                 | Cubic        | F23         | 15.1096(4)  | 90           | 7.42                | 5.36               |
| 0.6                                                                 | Cubic        | F23         | 15.0957(6)  | 90           | 7.83                | 5.52               |
| 1.0                                                                 | Cubic        | F23         | 15.0958(3)  | 90           | 7.67                | 5.45               |
| 1.2                                                                 | Cubic        | F23         | 15.0744(3)  | 90           | 6.91                | 4.98               |
| 1.5                                                                 | Cubic        | F23         | 15.0602(3)  | 90           | 9.50                | 6.94               |
| $\text{Ca}_{14}\text{Zn}_6\text{Ga}_{10-x}\text{Mn}_x\text{O}_{35}$ |              |             |             |              |                     |                    |
| x                                                                   | Lattice Type | Space Group | Lattice (Å) | $\alpha$ (°) | $R_{\text{wp}}$ (%) | $R_{\text{p}}$ (%) |
| 0.2                                                                 | Cubic        | F23         | 15.1092 (7) | 90           | 8.66                | 6.20               |
| 0.3                                                                 | Cubic        | F23         | 15.1085 (4) | 90           | 8.33                | 6.15               |
| 0.6                                                                 | Cubic        | F23         | 15.0928 (6) | 90           | 7.82                | 5.40               |
| 0.8                                                                 | Cubic        | F23         | 15.0796 (5) | 90           | 6.73                | 4.89               |
| 1.0                                                                 | Cubic        | F23         | 15.0693 (6) | 90           | 7.63                | 5.52               |
| 1.2                                                                 | Cubic        | F23         | 15.0651 (8) | 90           | 6.82                | 4.91               |
| $\text{Ca}_{14}\text{Zn}_6\text{Ga}_{10-x}\text{Fe}_x\text{O}_{35}$ |              |             |             |              |                     |                    |
| x                                                                   | Lattice Type | Space Group | Lattice (Å) | $\alpha$ (°) | $R_{\text{wp}}$ (%) | $R_{\text{p}}$ (%) |
| 0.3                                                                 | Cubic        | F23         | 15.1041(5)  | 90           | 8.13                | 5.44               |
| 0.6                                                                 | Cubic        | F23         | 15.0992(4)  | 90           | 9.64                | 6.74               |
| 1.0                                                                 | Cubic        | F23         | 15.0782(5)  | 90           | 7.70                | 5.15               |
| 2.0                                                                 | Cubic        | F23         | 15.1049(4)  | 90           | 6.87                | 5.01               |
| 3.0                                                                 | Cubic        | F23         | 15.1182(5)  | 90           | 8.43                | 5.99               |
| $\text{Ca}_{14}\text{Zn}_6\text{Ga}_{10-x}\text{Co}_x\text{O}_{35}$ |              |             |             |              |                     |                    |
| x                                                                   | Lattice Type | Space Group | Lattice (Å) | $\alpha$ (°) | $R_{\text{wp}}$ (%) | $R_{\text{p}}$ (%) |
| 0.3                                                                 | Cubic        | F23         | 15.0671(6)  | 90           | 9.21                | 6.14               |
| 0.6                                                                 | Cubic        | F23         | 15.0600(4)  | 90           | 10.09               | 6.92               |
| 0.8                                                                 | Cubic        | F23         | 15.0532(5)  | 90           | 10.29               | 6.86               |
| 1.0                                                                 | Cubic        | F23         | 15.0594(5)  | 90           | 9.03                | 5.68               |
| 1.5                                                                 | Cubic        | F23         | 15.0530(6)  | 90           | 9.34                | 6.04               |

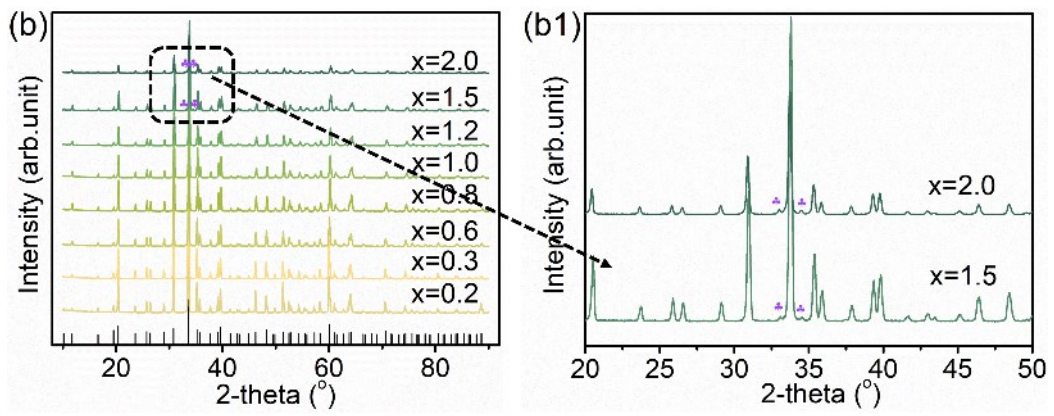

Fig. S5. Powder of x-ray diffraction spectra of (b)  $\text{Ca}_{14}\text{Zn}_6\text{Ga}_{10-x}\text{Mn}_x\text{O}_{35}$  (b1) The enlargement of the X-ray diffraction spectra of  $\text{Ca}_{14}\text{Zn}_6\text{Ga}_{10-x}\text{Mn}_x\text{O}_{35}$  ( $x=1.5$ ,  $x=2.0$ ).

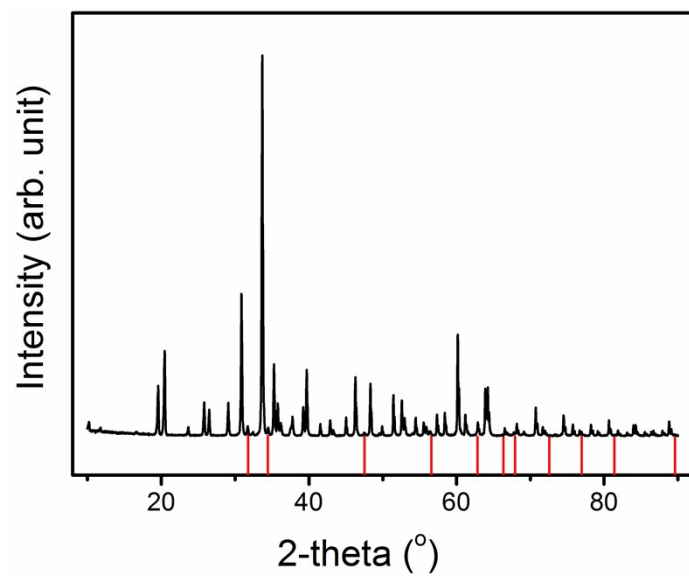

Fig. S6. Powder of x-ray diffraction of  $\text{Ca}_{14}\text{Zn}_6\text{Ga}_8\text{Co}_2\text{O}_{35}$  sample, red bars indicate the diffraction peak positions of an impurity phase of ZnO due to the overdose doping of Co.



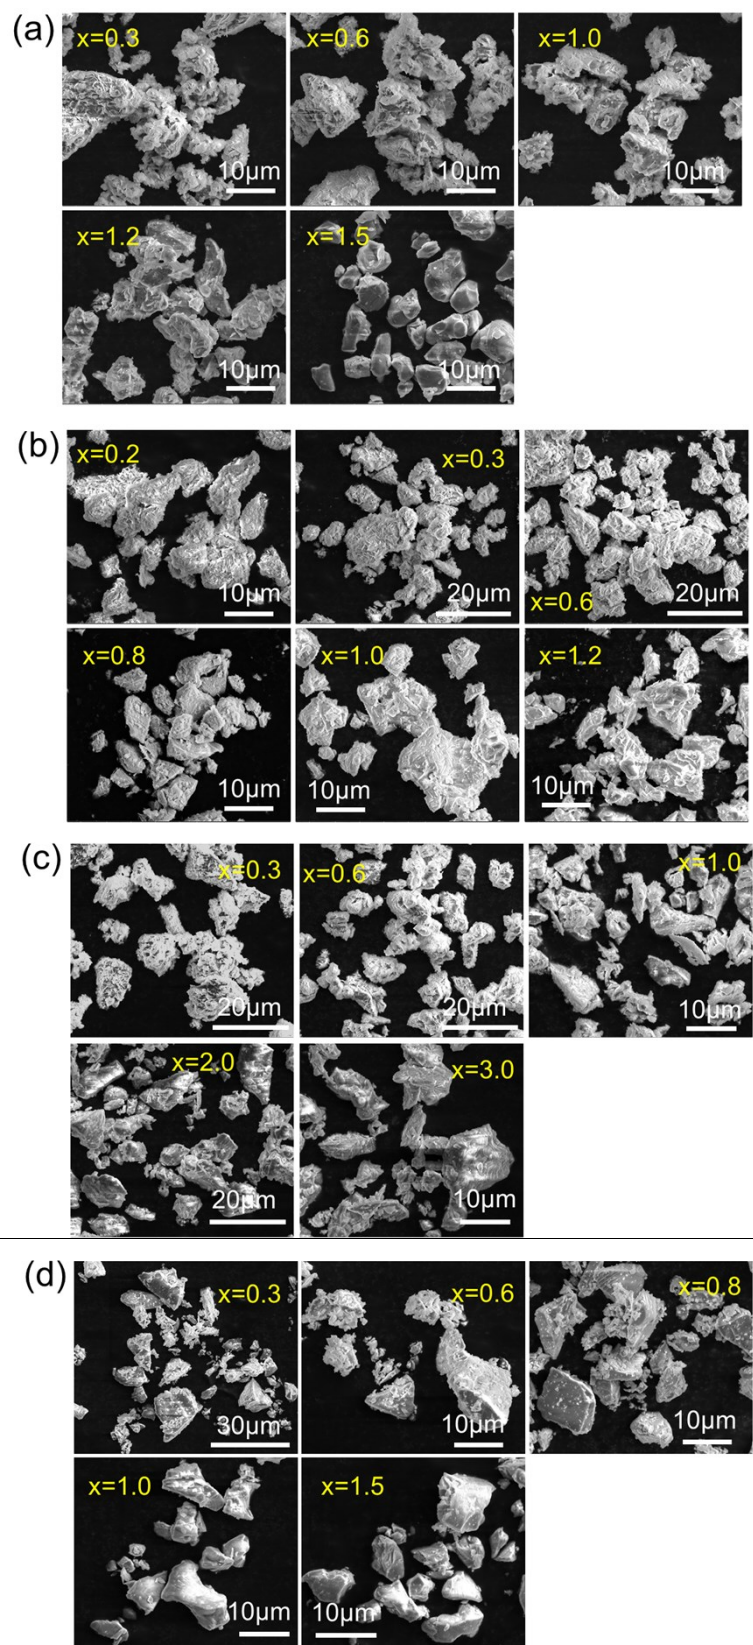

Fig. S7 SEM graphs of as-synthesized  $\text{Ca}_{14}\text{Zn}_6\text{Ga}_{10-x}\text{M}_x\text{O}_{35}$  samples: (a) Cr, (b) Mn, (c) Fe, and (d) Co, respectively.

Table S2. CIE-Lab parameters of  $\text{Ca}_{14}\text{Zn}_6\text{Ga}_{10-x}\text{Cr}_x\text{O}_{35}$  ( $x=0.3, 0.6, 1.0, 1.2, 1.5$ ) at different temperature.

| T(°C) | x=0.3 |    |    | x=0.6 |    |    | x=1.0 |    |    | x=1.2 |    |    | x=1.5 |    |    |
|-------|-------|----|----|-------|----|----|-------|----|----|-------|----|----|-------|----|----|
|       | L*    | a  | b  |
| 20    | 53    | 23 | 12 | 47    | 26 | 13 | 38    | 26 | 17 | 34    | 24 | 15 | 31    | 7  | 9  |
| 80    | 53    | 20 | 10 | 47    | 24 | 12 | 38    | 22 | 17 | 31    | 20 | 15 | 30    | 5  | 10 |
| 110   | 53    | 19 | 11 | 45    | 20 | 11 | 34    | 18 | 14 | 33    | 18 | 14 | 28    | 5  | 8  |
| 140   | 55    | 19 | 11 | 48    | 20 | 11 | 35    | 19 | 14 | 30    | 17 | 12 | 28    | 3  | 8  |
| 170   | 57    | 16 | 10 | 51    | 19 | 11 | 36    | 19 | 13 | 32    | 17 | 12 | 31    | 3  | 8  |
| 200   | 54    | 15 | 11 | 48    | 18 | 12 | 34    | 17 | 13 | 28    | 14 | 12 | 25    | 0  | 8  |
| 230   | 53    | 15 | 11 | 48    | 17 | 11 | 33    | 13 | 13 | 26    | 10 | 12 | 24    | -1 | 8  |
| 260   | 52    | 13 | 10 | 47    | 14 | 10 | 30    | 11 | 13 | 25    | 8  | 11 | 23    | -3 | 8  |
| 290   | 52    | 12 | 10 | 41    | 12 | 10 | 34    | 8  | 13 | 28    | 8  | 12 | 24    | -3 | 10 |
| 320   | 53    | 11 | 10 | 45    | 11 | 10 | 35    | 9  | 12 | 26    | 7  | 12 | 25    | -4 | 10 |
| 350   | 55    | 10 | 12 | 48    | 12 | 13 | 34    | 10 | 13 | 28    | 8  | 12 | 25    | -4 | 10 |
| 380   | 52    | 10 | 13 | 45    | 11 | 13 | 34    | 7  | 12 | 25    | 5  | 12 | 24    | -4 | 9  |
| 400   | 53    | 8  | 11 | 42    | 8  | 11 | 31    | 8  | 13 | 25    | 5  | 12 | 21    | -4 | 10 |
| 420   | 56    | 8  | 16 | 51    | 10 | 15 | 32    | 8  | 12 | 25    | 5  | 12 | 23    | -4 | 11 |
| 440   | 56    | 9  | 16 | 45    | 12 | 15 | 31    | 8  | 13 | 26    | 6  | 13 | 26    | -4 | 11 |
| 460   | 56    | 9  | 15 | 49    | 9  | 16 | 34    | 7  | 13 | 27    | 5  | 14 | 25    | -4 | 12 |

Table S3. CIE-Lab parameters of  $\text{Ca}_{14}\text{Zn}_6\text{Ga}_{10-x}\text{Mn}_x\text{O}_{35}$  ( $x=0.2, 0.3, 0.6, 0.8, 1.0, 1.2, 1.5, 2.0$ ) at different temperature.

| T(°C) | x=0.2 |     |    | x=0.3 |     |    | x=0.6 |     |    | x=0.8 |     |    |
|-------|-------|-----|----|-------|-----|----|-------|-----|----|-------|-----|----|
|       | L*    | a   | b  |
| 20    | 77    | -2  | 39 | 80    | -7  | 39 | 78    | -9  | 48 | 74    | -18 | 53 |
| 80    | 79    | 2   | 35 | 82    | -3  | 38 | 77    | -3  | 46 | 72    | -11 | 51 |
| 110   | 78    | 3   | 32 | 80    | -1  | 34 | 77    | -1  | 43 | 74    | -9  | 47 |
| 140   | 78    | 3   | 32 | 81    | 1   | 34 | 76    | 2   | 42 | 73    | -5  | 45 |
| 170   | 76    | 7   | 30 | 78    | 6   | 33 | 73    | 6   | 41 | 70    | 0   | 44 |
| 200   | 75    | 7   | 30 | 79    | 7   | 34 | 69    | 9   | 42 | 67    | 2   | 42 |
| 230   | 75    | 7   | 26 | 77    | 8   | 30 | 71    | 10  | 37 | 64    | 7   | 40 |
| 260   | 71    | 9   | 28 | 74    | 12  | 31 | 71    | 12  | 35 | 64    | 13  | 41 |
| 290   | 75    | 9   | 25 | 78    | 11  | 27 | 68    | 14  | 32 | 63    | 13  | 33 |
| 320   | 70    | 9   | 23 | 72    | 13  | 25 | 67    | 16  | 30 | 61    | 15  | 31 |
| 350   | 74    | 10  | 22 | 77    | 14  | 25 | 65    | 18  | 28 | 61    | 16  | 30 |
| 380   | 74    | 12  | 24 | 77    | 14  | 26 | 66    | 19  | 28 | 59    | 19  | 29 |
| 400   | 69    | 10  | 21 | 70    | 14  | 23 | 65    | 19  | 26 | 59    | 19  | 27 |
| 420   | 70    | 10  | 21 | 73    | 15  | 23 | 67    | 19  | 28 | 62    | 21  | 28 |
| 440   | 68    | 10  | 20 | 69    | 16  | 22 | 63    | 20  | 26 | 57    | 20  | 25 |
| 460   | 71    | 11  | 21 | 70    | 14  | 22 | 62    | 19  | 24 | 58    | 20  | 23 |
| T(°C) | x=1.0 |     |    | x=1.2 |     |    | x=1.5 |     |    | x=2.0 |     |    |
|       | L*    | a   | b  |
| 20    | 71    | -24 | 46 | 64    | -29 | 29 | 53    | -25 | 12 | 50    | -23 | 4  |
| 80    | 72    | -20 | 46 | 63    | -25 | 28 | 48    | -20 | 10 | 45    | -19 | 3  |
| 110   | 70    | -17 | 44 | 62    | -24 | 27 | 48    | -20 | 10 | 46    | -18 | 2  |
| 140   | 69    | -14 | 41 | 62    | -20 | 26 | 48    | -18 | 8  | 46    | -17 | 1  |
| 170   | 69    | -12 | 41 | 62    | -19 | 25 | 48    | -18 | 7  | 46    | -17 | 1  |
| 200   | 67    | -9  | 38 | 60    | -17 | 22 | 48    | -16 | 5  | 45    | -16 | 0  |
| 230   | 67    | -5  | 37 | 60    | -15 | 22 | 47    | -14 | 5  | 45    | -15 | -1 |
| 260   | 66    | -1  | 35 | 60    | -12 | 22 | 46    | -13 | 4  | 44    | -13 | -1 |
| 290   | 65    | 2   | 33 | 59    | -9  | 20 | 46    | -11 | 4  | 43    | -12 | -2 |
| 320   | 63    | 5   | 32 | 57    | -7  | 19 | 45    | -10 | 3  | 43    | -11 | -2 |
| 350   | 63    | 7   | 28 | 58    | -5  | 17 | 46    | -7  | 3  | 45    | -10 | -3 |
| 380   | 62    | 9   | 26 | 56    | -3  | 17 | 43    | -7  | 3  | 42    | -9  | -2 |
| 400   | 60    | 10  | 24 | 55    | -2  | 16 | 42    | -6  | 3  | 41    | -9  | -2 |
| 420   | 60    | 10  | 24 | 54    | -1  | 17 | 42    | -4  | 3  | 42    | -8  | -1 |
| 440   | 56    | 12  | 21 | 52    | 1   | 15 | 44    | -4  | 3  | 44    | -8  | -2 |
| 460   | 57    | 12  | 21 | 53    | 2   | 15 | 42    | -3  | 2  | 43    | -8  | -3 |

Table S4. CIE-Lab parameters of  $\text{Ca}_{14}\text{Zn}_6\text{Ga}_{10-x}\text{Fe}_x\text{O}_{35}$  ( $x= 0.3, 0.6, 1.0, 2.0, 3.0$ ) at different temperature.

| T(°C) | x=0.3 |    |    | x=0.6 |    |    | x=1.0 |    |    | x=2.0 |    |    | x=3.0 |    |    |
|-------|-------|----|----|-------|----|----|-------|----|----|-------|----|----|-------|----|----|
|       | L*    | a  | b  |
| 20    | 81    | 5  | 48 | 78    | 5  | 44 | 74    | 9  | 44 | 63    | 13 | 46 | 56    | 18 | 37 |
| 80    | 80    | 7  | 48 | 77    | 7  | 44 | 71    | 12 | 42 | 65    | 16 | 42 | 54    | 18 | 37 |
| 110   | 75    | 9  | 43 | 78    | 10 | 43 | 66    | 12 | 38 | 63    | 16 | 40 | 52    | 20 | 34 |
| 140   | 79    | 8  | 42 | 74    | 9  | 41 | 69    | 11 | 37 | 62    | 17 | 37 | 54    | 18 | 31 |
| 170   | 75    | 10 | 41 | 75    | 10 | 41 | 63    | 13 | 33 | 58    | 16 | 32 | 50    | 19 | 30 |
| 200   | 74    | 11 | 41 | 76    | 11 | 42 | 62    | 13 | 33 | 55    | 16 | 29 | 48    | 19 | 30 |
| 230   | 74    | 9  | 40 | 74    | 10 | 37 | 63    | 12 | 30 | 56    | 16 | 27 | 49    | 16 | 26 |
| 260   | 70    | 10 | 35 | 75    | 10 | 33 | 61    | 11 | 26 | 55    | 15 | 26 | 46    | 15 | 21 |
| 290   | 75    | 8  | 37 | 70    | 9  | 34 | 64    | 11 | 28 | 57    | 14 | 26 | 47    | 15 | 21 |
| 320   | 73    | 8  | 35 | 68    | 9  | 31 | 63    | 11 | 27 | 55    | 14 | 24 | 52    | 15 | 20 |
| 350   | 74    | 8  | 34 | 68    | 8  | 30 | 64    | 10 | 25 | 56    | 12 | 22 | 46    | 13 | 17 |
| 380   | 73    | 8  | 34 | 71    | 8  | 31 | 60    | 10 | 24 | 54    | 11 | 20 | 45    | 13 | 17 |
| 400   | 73    | 8  | 32 | 68    | 8  | 27 | 61    | 10 | 21 | 54    | 11 | 19 | 43    | 12 | 15 |
| 420   | 70    | 7  | 31 | 65    | 8  | 27 | 61    | 9  | 21 | 53    | 11 | 20 | 51    | 11 | 16 |
| 440   | 72    | 7  | 31 | 67    | 7  | 27 | 61    | 9  | 23 | 50    | 9  | 18 | 44    | 10 | 14 |
| 460   | 70    | 6  | 32 | 66    | 7  | 29 | 62    | 8  | 21 | 48    | 10 | 19 | 53    | 10 | 16 |

Table S5. CIE-Lab parameters of  $\text{Ca}_{14}\text{Zn}_6\text{Ga}_{10-x}\text{Co}_x\text{O}_{35}$  ( $x= 0.3, 0.6, 0.8, 1.0, 1.5$ ) at different temperature.

| T(°C) | x=0.3 |     |    | x=0.6 |     |    | x=0.8 |     |    | x=1.0 |     |    | x=1.5 |     |    |
|-------|-------|-----|----|-------|-----|----|-------|-----|----|-------|-----|----|-------|-----|----|
|       | L*    | a   | b  |
| 20    | 72    | -20 | 23 | 68    | -21 | 30 | 66    | -21 | 27 | 52    | -19 | 16 | 41    | -13 | 12 |
| 80    | 72    | -18 | 24 | 67    | -17 | 29 | 69    | -22 | 29 | 50    | -20 | 18 | 38    | -12 | 10 |
| 110   | 71    | -16 | 24 | 66    | -17 | 28 | 67    | -19 | 27 | 53    | -17 | 16 | 42    | -11 | 10 |
| 140   | 70    | -15 | 23 | 66    | -15 | 28 | 67    | -18 | 28 | 52    | -17 | 17 | 41    | -12 | 12 |
| 170   | 69    | -15 | 23 | 65    | -15 | 27 | 69    | -18 | 29 | 50    | -14 | 14 | 42    | -10 | 10 |
| 200   | 70    | -13 | 22 | 64    | -14 | 27 | 68    | -16 | 27 | 52    | -15 | 16 | 44    | -10 | 10 |
| 230   | 70    | -12 | 21 | 65    | -12 | 26 | 66    | -15 | 27 | 51    | -14 | 18 | 43    | -9  | 11 |
| 260   | 69    | -11 | 20 | 63    | -11 | 24 | 65    | -14 | 26 | 50    | -13 | 17 | 42    | -6  | 8  |
| 290   | 70    | -10 | 19 | 65    | -11 | 23 | 64    | -13 | 24 | 48    | -12 | 14 | 41    | -7  | 9  |
| 320   | 70    | -9  | 18 | 63    | -9  | 23 | 65    | -13 | 26 | 47    | -11 | 15 | 40    | -6  | 10 |
| 350   | 69    | -9  | 17 | 64    | -9  | 21 | 64    | -11 | 24 | 48    | -11 | 15 | 40    | -6  | 8  |
| 380   | 69    | -8  | 17 | 64    | -8  | 22 | 63    | -10 | 25 | 50    | -10 | 16 | 39    | -5  | 8  |
| 400   | 71    | -8  | 18 | 64    | -8  | 21 | 64    | -11 | 25 | 47    | -9  | 15 | 38    | -6  | 8  |
| 420   | 68    | -7  | 17 | 63    | -8  | 22 | 66    | -10 | 26 | 49    | -9  | 16 | 40    | -4  | 8  |
| 440   | 69    | -8  | 17 | 64    | -8  | 24 | 64    | -10 | 26 | 49    | -9  | 15 | 39    | -5  | 7  |
| 460   | 72    | -8  | 22 | 63    | -7  | 26 | 64    | -9  | 26 | 48    | -8  | 15 | 38    | -4  | 8  |

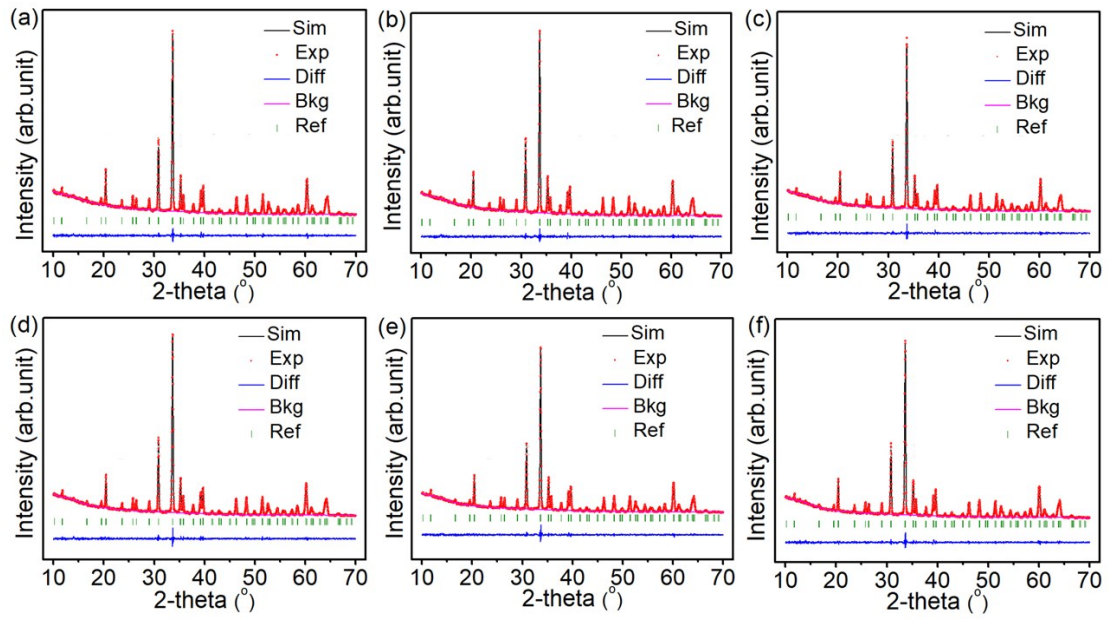

Figure S8. Pawley refinement of powder x-ray diffraction spectra (in heating process) of  $\text{Ca}_{14}\text{Zn}_6\text{Ga}_{8.8}\text{Mn}_{1.2}\text{O}_{35}$  measured at (a) room temperature, (b) 100  $^\circ\text{C}$ , (c) 200  $^\circ\text{C}$ , (d) 300  $^\circ\text{C}$ , (e) 400  $^\circ\text{C}$ , and (f) 500  $^\circ\text{C}$ , respectively.

Table S6 Refinement results of powder x-ray diffraction spectra of  $\text{Ca}_{14}\text{Zn}_6\text{Ga}_{8.8}\text{Mn}_{1.2}\text{O}_{35}$  at different temperature.

| $\text{Ca}_{14}\text{Zn}_6\text{Ga}_{8.8}\text{Mn}_{1.2}\text{O}_{35}$ |              |             |             |              |                     |                    |
|------------------------------------------------------------------------|--------------|-------------|-------------|--------------|---------------------|--------------------|
| T(°C)                                                                  | Lattice Type | Space Group | Lattice (Å) | $\alpha$ (°) | $R_{\text{wp}}$ (%) | $R_{\text{p}}$ (%) |
| RT                                                                     | Cubic        | F23         | 15.0234(14) | 90           | 3.60                | 2.71               |
| 100                                                                    | Cubic        | F23         | 15.0360(15) | 90           | 3.68                | 2.80               |
| 200                                                                    | Cubic        | F23         | 15.0476(14) | 90           | 3.64                | 2.81               |
| 300                                                                    | Cubic        | F23         | 15.0672(15) | 90           | 3.68                | 2.81               |
| 400                                                                    | Cubic        | F23         | 15.0791(14) | 90           | 3.87                | 3.04               |
| 500                                                                    | Cubic        | F23         | 15.0936(14) | 90           | 3.66                | 2.82               |
